# Supplementary material for: Peer-to-Peer, Interactive GP Education can Reduce Barriers to Best Practice in Diabetes Management
Source: PubMed Central journal article supplement — Diabetes Ther. 2016 Feb 18;7(1):153–61. doi: 10.1007/s13300-016-0156-0 (PMC4801819; doi:10.1007/s13300-016-0156-0), 2016-02-18
Supplement: 13300_2016_156_MOESM1_ESM.pdf [file 13300_2016_156_MOESM1_ESM.pdf]

## *Why carry out this study?*

- Many general practitioners in Australia may be reluctant to prescribe insulin for patients with type 2 diabetes (T2D) due to perceptions that initiating insulin therapy is complex and difficult to manage.
- This study explored the development and impact of a highly interactive educational program for general practitioners that used peer-to-peer education to improve general practitioners' knowledge of and confidence towards initiating insulin therapy in patients with T2D.

## *What was learned from the study?*

- Improvements in general practitioners' negative perceptions of insulin therapy were accompanied by a decreased need to refer T2D patients to specialist care and an increased willingness to initiate insulin therapy within their own practice, with these changes persisting 3 months after completion of the education workshop.
- An educational program incorporating peer-to-peer learning successfully overcame general practitioners' negative perceptions of the difficulties of initiating insulin therapy and achieved real changes in their clinical practice.

This summary slide represents the opinions of the authors. Sponsorship for this study was funded by Sanofi Australia. Medical writing assistance for this study was provided by Vivacity Health (Viv Allen). For a full list of acknowledgments and disclosures for all authors of this article, please see the full text online. © The Author(s) 2016. Creative Commons Attribution Noncommercial License (CC BY-NC).
